# Supplementary material for: Proteolysis-targeting vaccines (PROTAVs) for robust combination immunotherapy of melanoma
Source: PubMed Central journal article supplement — bioRxiv. 2024 Nov 4:2024.10.01.616069. Preprint. [Version 2] doi: 10.1101/2024.10.01.616069 (PMC11580958; doi:10.1101/2024.10.01.616069), 2024-11-04
Supplement: NIHPP2024.10.01.616069v2-supplement-1.pdf [file NIHPP2024.10.01.616069v2-supplement-1.pdf]

## Supplementary Information

### Table of Content

**Supplementary Fig. 1** | Chemical structures and MS spectra of pomalidomide-EG<sub>4</sub>-Mal (a) and pomalidomide-EG<sub>4</sub>-NHS (b).

**Supplementary Fig. 2** | Stability of pomalidomide-EG<sub>4</sub> in serum measured by LC-MS.

**Supplementary Fig. 3** | Characterization of PTOTAV-OVA conjugation ratio.

**Supplementary Fig. 4** | Tetramer staining of mouse PBMC CD8<sup>+</sup> T cells from mice immunized with OVA or physical mixture of OVA and pomalidomide.

**Supplementary Fig. 5** | Nano ITC results showing the CRBN binding between PROTAV-OVA and CRBN.

**Supplementary Fig. 6** | Tetramer staining of mouse PBMC CD8<sup>+</sup> T cells from mice immunized with PROVA-OVA synthesized using two conjugation methods.

**Supplementary Fig. 7** | Complete images of Western blot results.

**Supplementary Fig. 8** | RNA-seq GO analysis of the top 140 differentially expressed genes from BMDCs treated with PROTAV-OVA vs. OVA.

**Supplementary Fig. 9** | ESI-MS spectra of PROTAV-TgT.

**Supplementary Fig. 10** | Flow cytometry analysis of CD44 and CD62L levels on PBMC CD8<sup>+</sup> T cells demonstrates that PROTAV-TgT elicited CD8<sup>+</sup> T cell memory.

**Supplementary Fig. 11** | CD8/Treg ratio in B16F10 TME following treatment with PROTAV TgT and ICB.

**Supplementary Fig. 12** | B16F10 tumor growth curves and Kaplan-Meier mouse survival curves of mice treated with ICB combined with PROTAV-TgT with single CpG adjuvant or biadjuvant Svg3/CpG.

**Supplementary Fig. 13** | Body weight of B16F10 tumor-bearing mice after treatments with PROTAV + ICB or controls.

**Supplementary Fig. 14** | Gating strategy for H-2K<sup>b</sup>/SIINFEKL staining for *in vitro* DCs.

**Supplementary Fig. 15** | Gating strategy for PBMC T cell staining.

**Supplementary Fig. 16** | Gating strategy for staining DCs and T cells from lymph nodes.

**Supplementary Fig. 17** | Gating strategy for TME T cell staining.

**Supplementary Table 1** | Oligonucleotide sequences.

**Supplementary Table 2** | A list of peptides used in this study.

**Supplementary Table 3** | A list of antibodies used in this study.



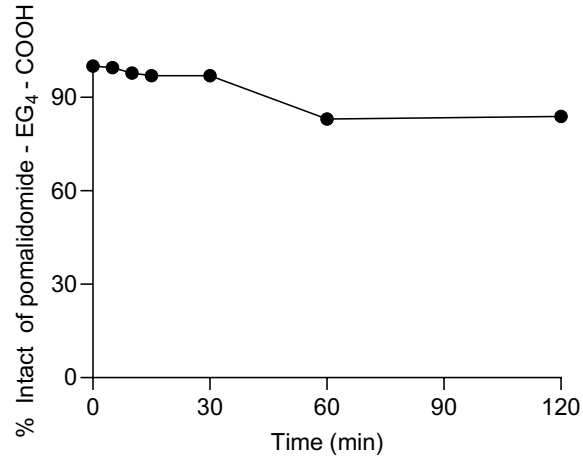

**Supplementary Fig. 2 | Stability of pomalidomide-EG<sub>4</sub>-COOH in serum measured by LC-MS.** Pomalidomide-EG<sub>4</sub>-COOH was incubated in serum for a series of durations up to 2 h, followed by LC-MS measurement to quantify the remaining intact pomalidomide-EG<sub>4</sub>-COOH.

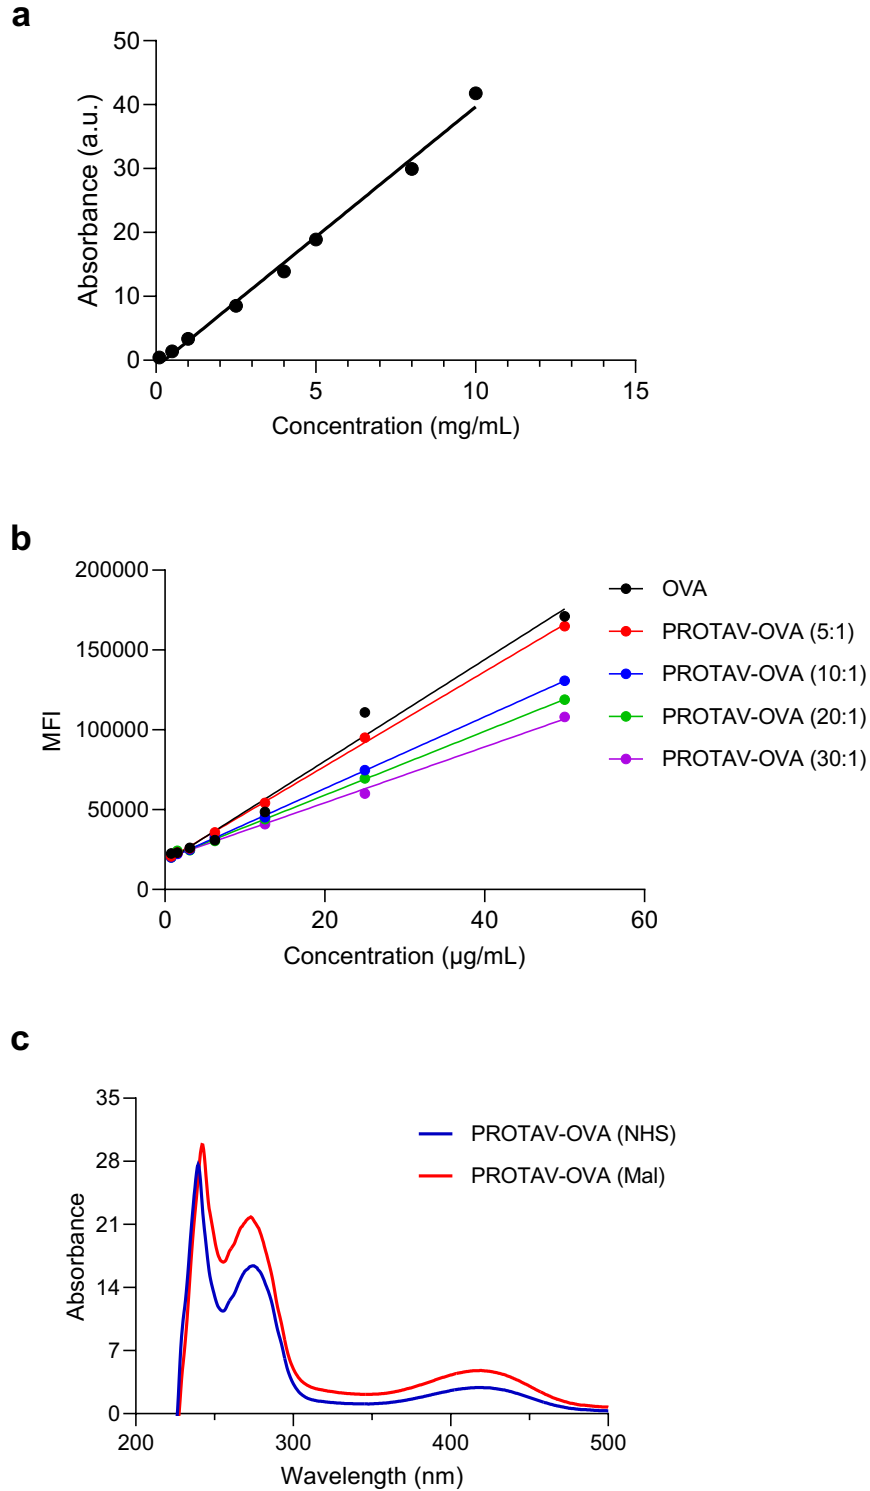

**Supplementary Fig. 3 | Characterization of PROTAV-OVA conjugation ratio.** **a**, Standard curve of pomalidomide-EG<sub>4</sub> absorbance (420 nm) vs. concentration. **b**, MFI of amine-reactive beads used in an amine-reactive fluorescent assay. The results were used to determine the copy numbers of pomalidomide-EG<sub>4</sub>-NHS conjugated per OVA with a series of pomalidomide-EG<sub>4</sub>-NHS: OVA feeding molar ratios. **c**, UV-vis spectra of PROTAV-OVA with two synthesis methods *via* NHS-EDC and maleimide-thiol conjugations, respectively.

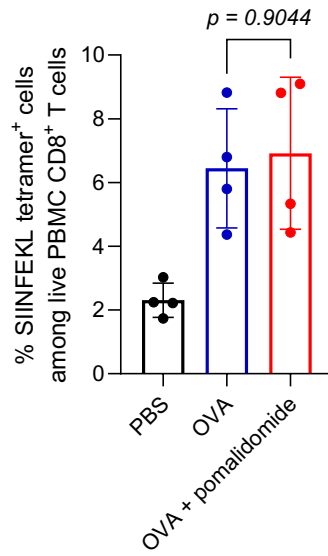

**Supplementary Fig. 4 | Tetramer staining of mouse PBMC CD8<sup>+</sup> T cells from mice immunized with OVA or physical mixture of OVA and pomalidomide (day 21).** C57BL/6 mice (6-8 weeks;  $n = 4$ ) were immunized by s.c. administration at tail base (day 0, day 14). CpG (2 nmole) adjuvant was mixed with OVA or pomalidomide + OVA (10  $\mu$ g).

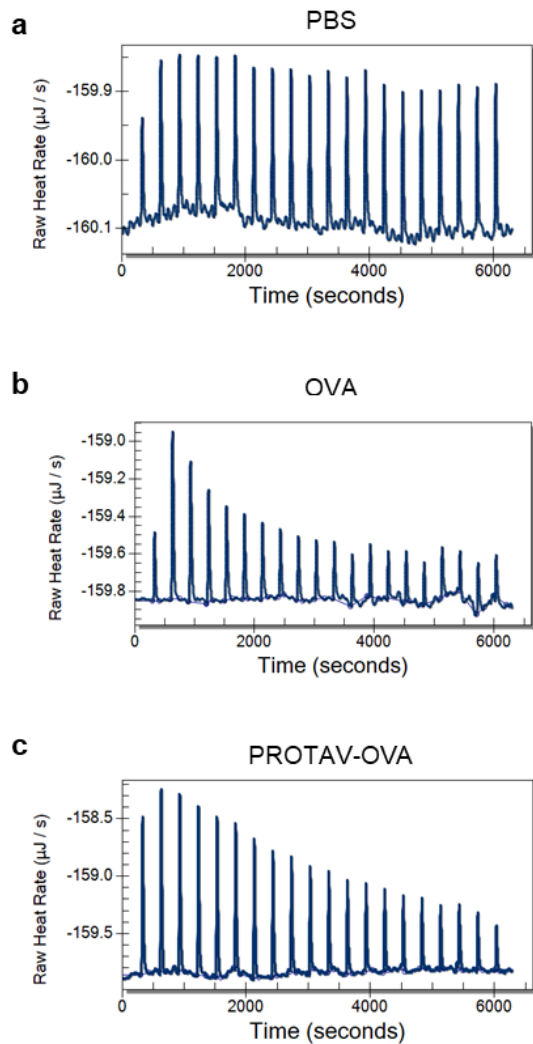

**Supplementary Fig. 5 | Nano ITC results showing the CRBN binding between PROTAV-OVA and CRBN protein.** Shown are nano ITC graphs of binding kinetics between CRBN and PBS (a), OVA (b), and PROTAV-OVA (c).

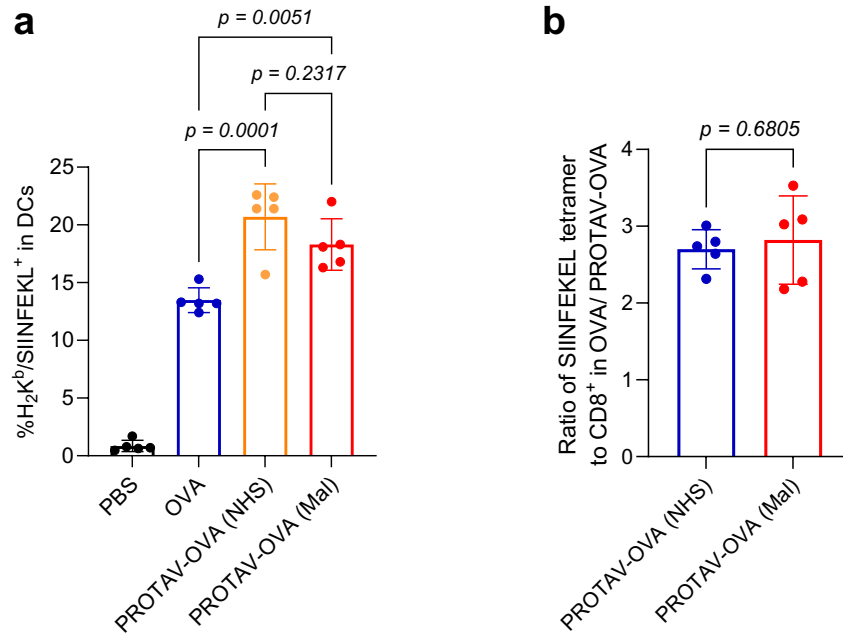

**Supplementary Fig. 6 | Tetramer staining of mouse PBMC CD8<sup>+</sup> T cells from mice immunized with PROVA-OVA synthesized using two conjugation methods. a**, MFI of H-2K<sup>b</sup>/SIINFEKL on DCs quantified from flow cytometry data showing that PROTAV-OVA promoted the presentation of SIINFEKL antigen epitope on DC2.4 cells following a 24-h treatment. **b**, The PROTAV-OVA: OVA ratio of H-2K<sup>b</sup>/SIINFEKL tetramer-positive PBMC CD8<sup>+</sup> cell fractions elicited by two PROTAV-OVA synthesized by two different conjugation methods (NHS-EDC and maleimide-thiol). These results suggest that these two conjugation chemistries enabled PROTAV-OVA for comparable enhancement of T cell responses over OVA. Mice were immunized by *s.c.* administration at tail base (day 0, day 14). PBMCs were collected for T cell analysis on day 21. CpG (2 nmole) adjuvant was mixed with OVA or PROTAV-OVA (10  $\mu$ g).

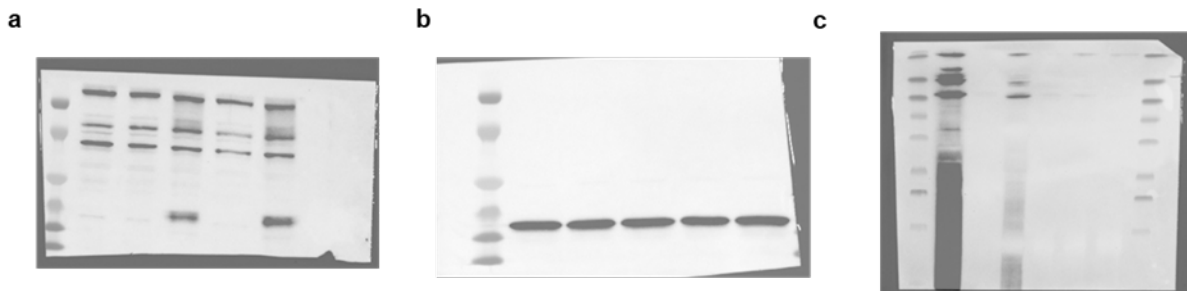

**Supplementary Fig. 7 | Complete images of Western blot results shown in Fig. 3. (a, b) correspond to Fig. 3e, and (c) corresponds to Fig. 3f.**

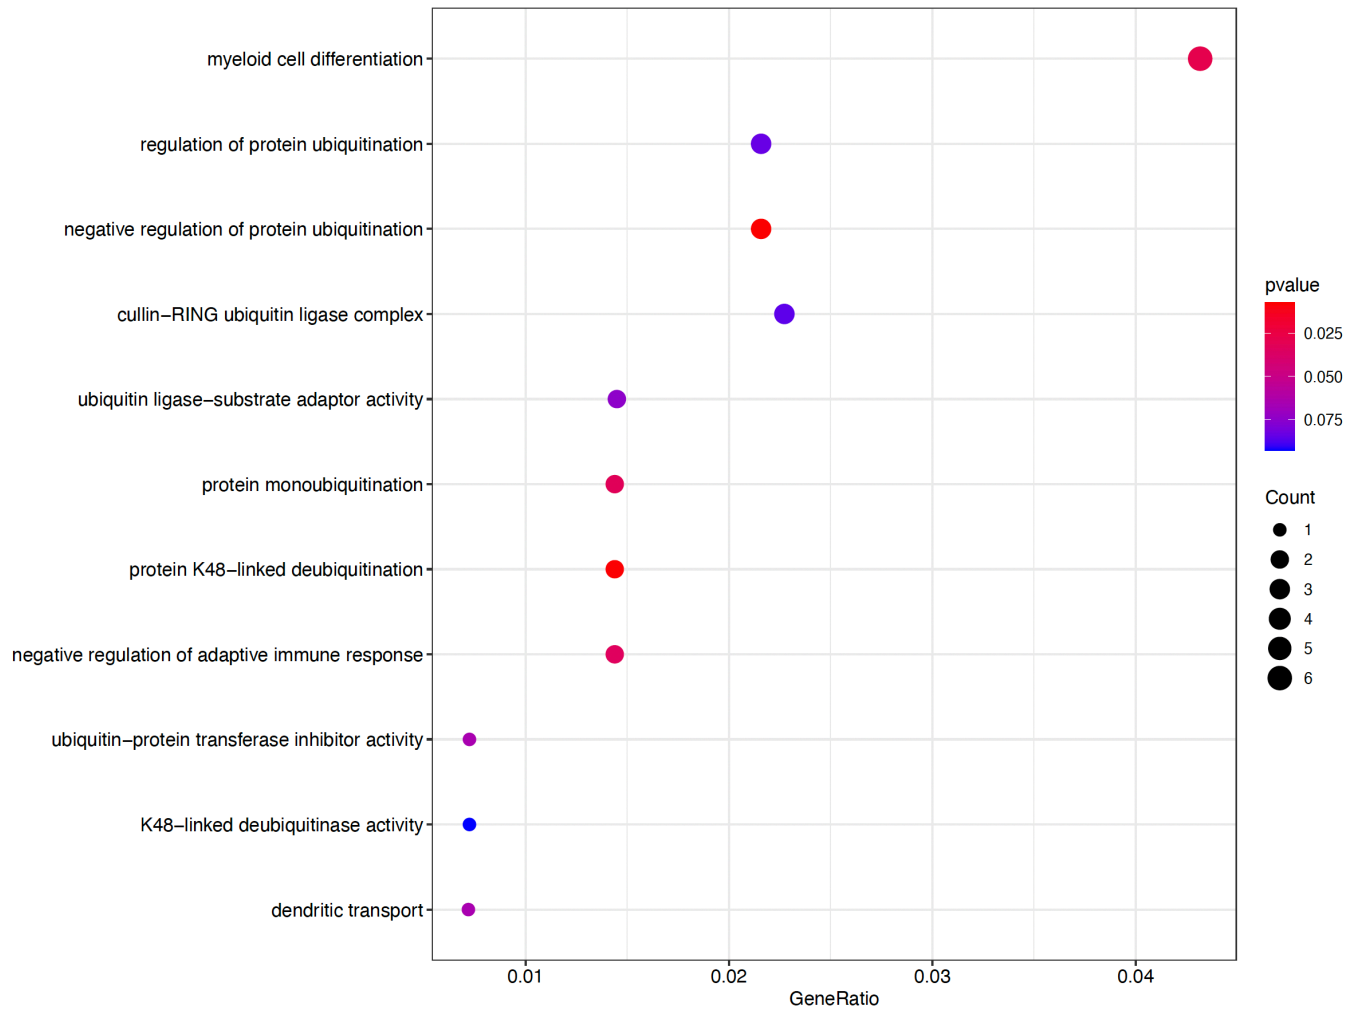

**Supplementary Fig. 8 | RNA-seq GO analysis of the top 140 differentially expressed genes from BMDCs treated with PROTAV-OVA vs. OVA.** The results indicate significant enrichment in pathways associated with ubiquitination and immunomodulation in BMDCs treated with PROTAV-OVA relative to OVA. 2 nmole/well CpG was used as an adjuvant, and all RNAseq GO analysis was conducted by using data from the treatment of CpG alone as background. Treatment: 24 h.



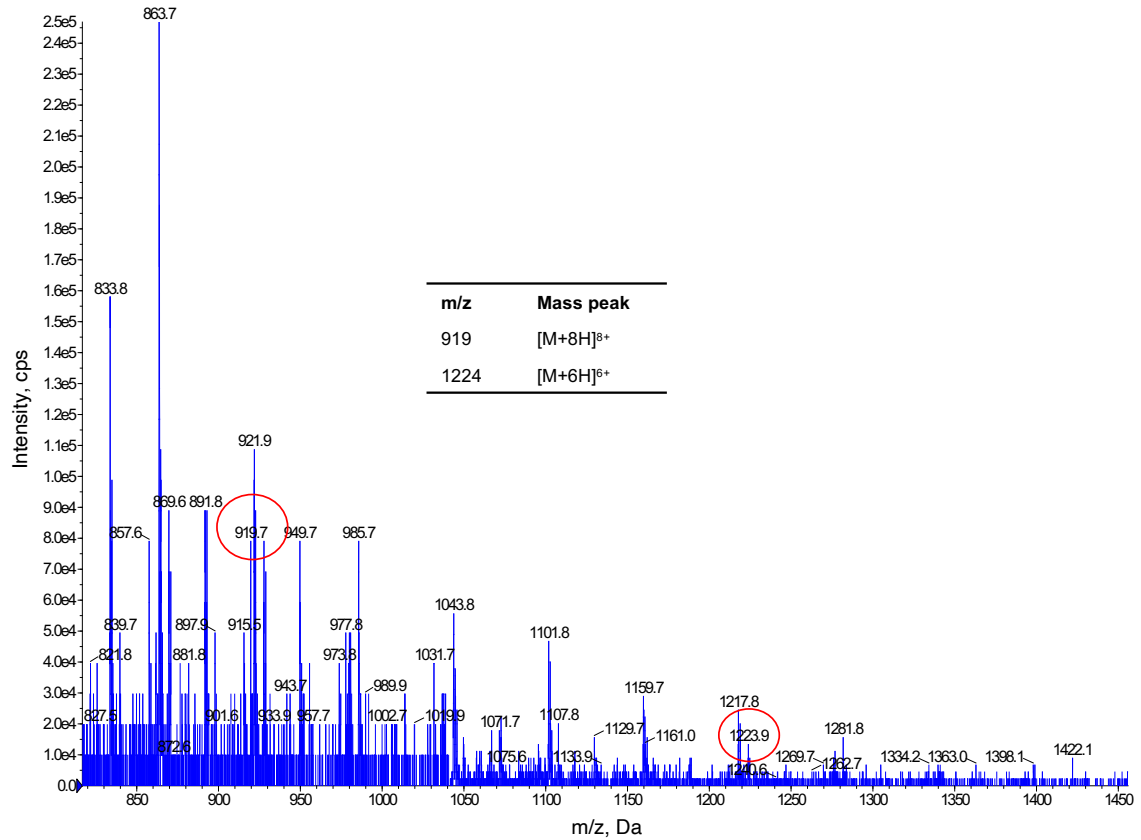

Supplementary Fig. 9 | ESI-MS spectra of PROTAV-TgT.

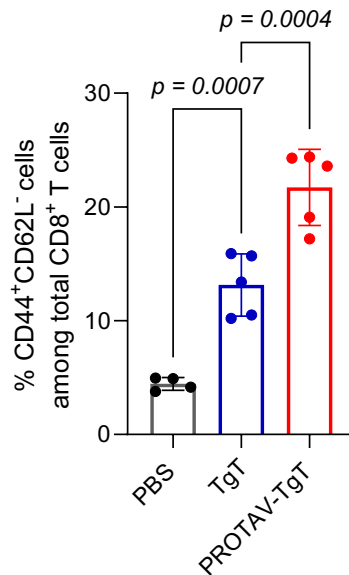

Supplementary Fig. 10 | Flow cytometry analysis of CD44 and CD62L levels on PBMC CD8<sup>+</sup> T cells demonstrates that PROTAV-TgT elicited CD8<sup>+</sup> T cell memory. Vaccines were delivered by SM-102 LNPs (dose: 20 µg antigen, 2 nmole CpG, 1 nmole Svg3).

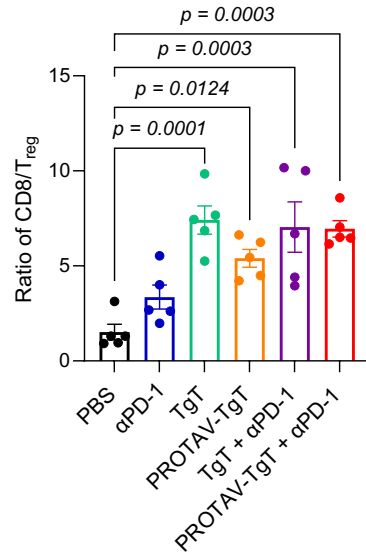

**Supplementary Fig. 11 | CD8/Treg ratio in B16F10 TME following treatment with PROTAV-TgT and ICB.** Vaccines were loaded in SM-102 LNPs (dose: 50 µg antigen, 2 nmole CpG, 1 nmole Svg3) and were s.c. injected at mouse tail base. αPD-1: 150 µg, *i.p.* administration.

**a**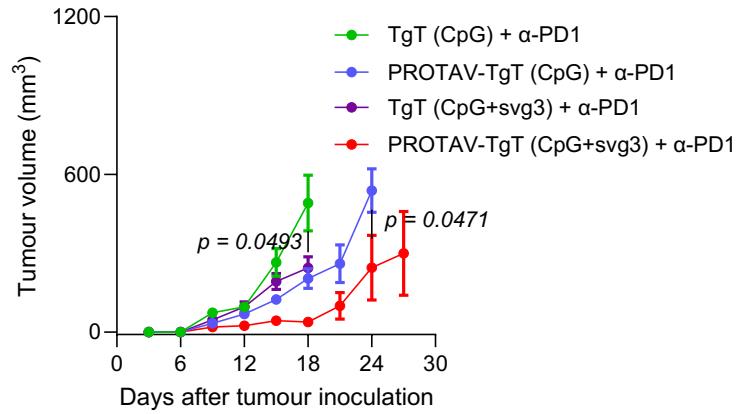**b**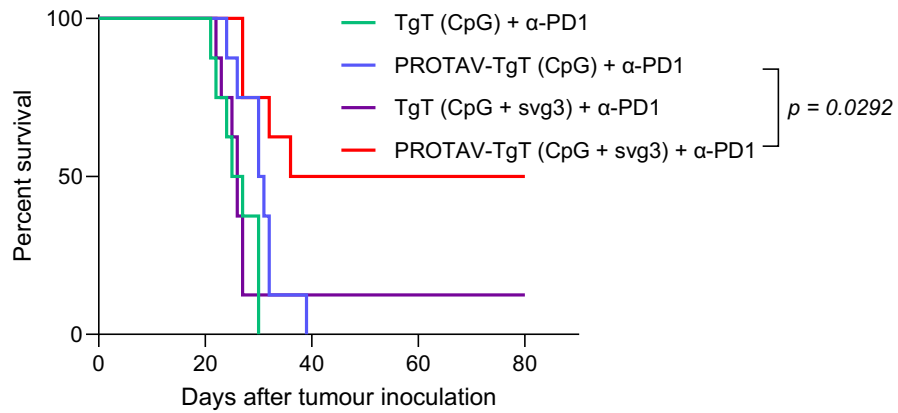

**Supplementary Fig. 12 | Tumor growth curves (a) and Kaplan-Meier mouse survival curves (b) of B16F10 melanoma-bearing C57BL/6 mice after the indicated αPD-1 combination therapies with PROTAV-TgT or TgT with CpG single adjuvant or Svg3/CpG biadjuvant.** PROTAV-TgT with biadjuvant Svg3/CpG outperformed PROTAV-TgT with single adjuvant CpG to inhibit tumor growth. Vaccines were loaded in SM-102 LNPs (dose: 50 μg antigen, 2 nmole CpG, 1 nmole Svg3) and were *s.c.* injected at mouse tail base. αPD-1: 150 μg, *i.p.* administration.

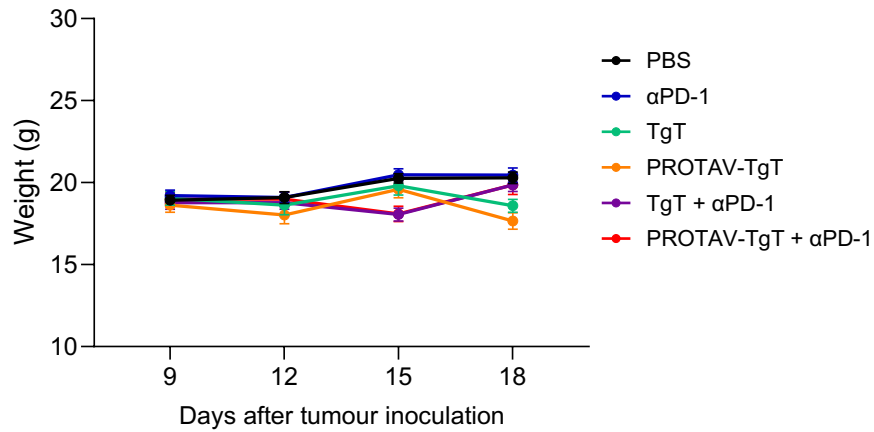

**Supplementary Fig. 13 | Body weight of B16F10 tumor-bearing mice after treatment with PROTAV + ICB or controls.** Vaccines were loaded in SM-102 LNPs (dose: 50 µg antigen, 2 nmole CpG, 1 nmole Svg3) and were *s.c.* injected at mouse tail base. αPD-1: 150 µg, *i.p.* administration.

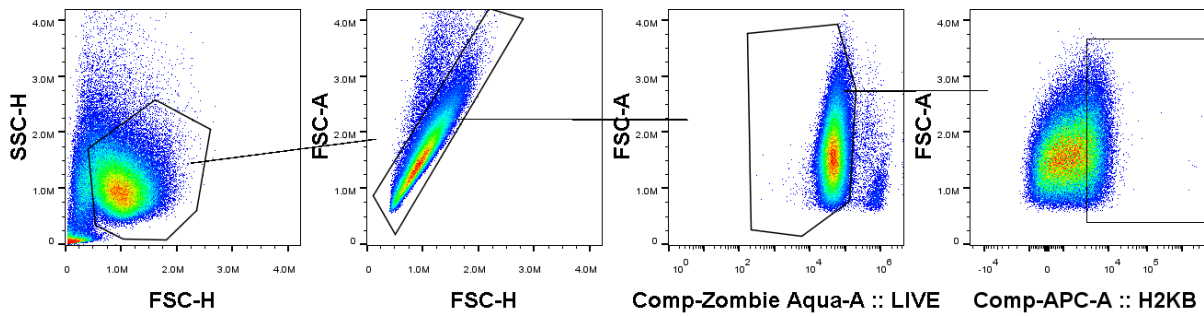

**Supplementary Fig. 14 | Gating strategy for H-2K<sup>b</sup>/SIINFEKL staining for cultured DCs.**

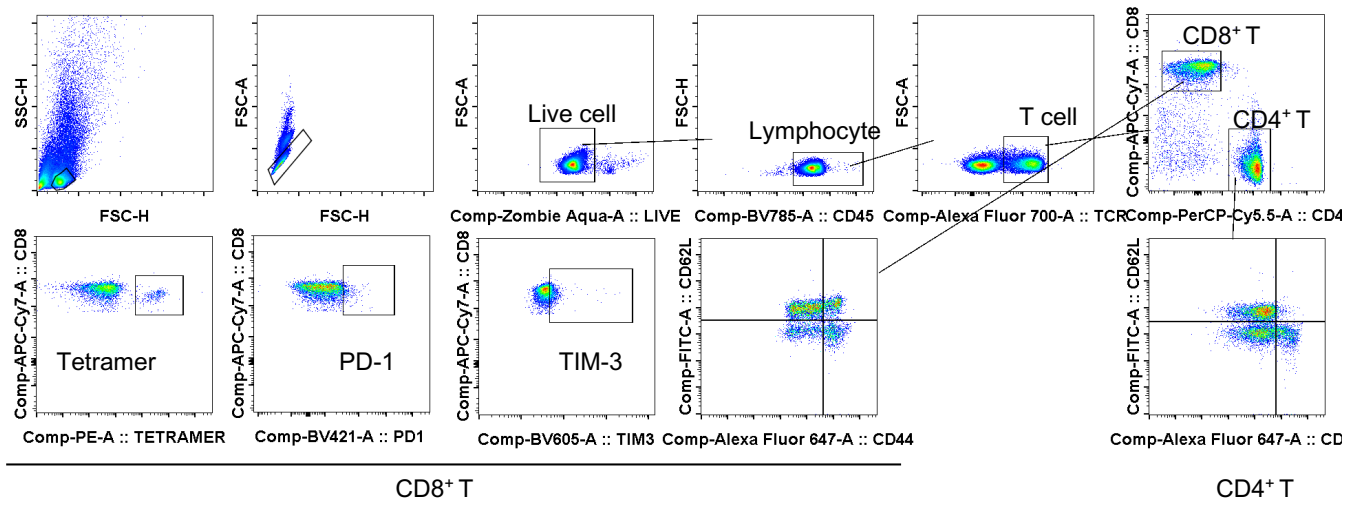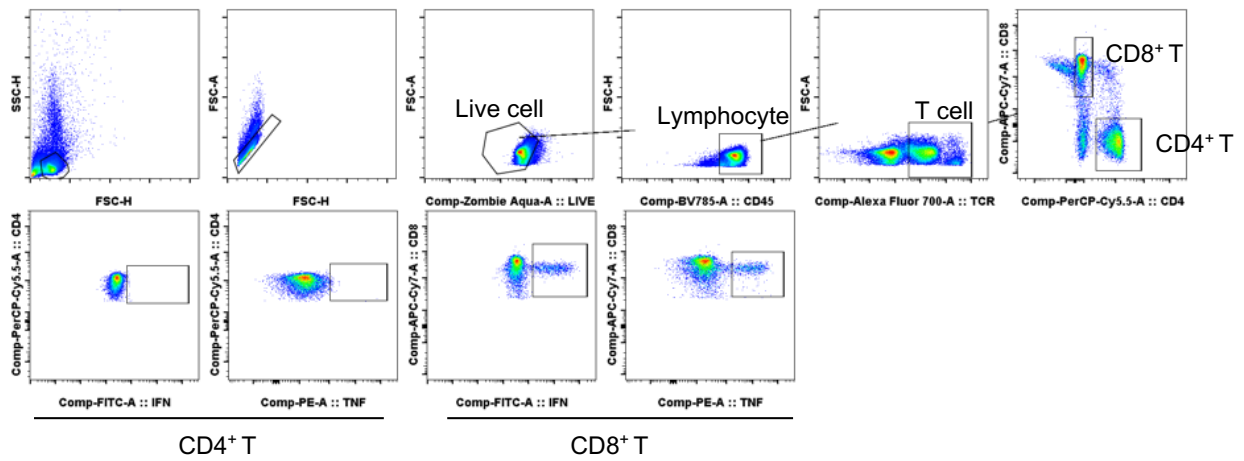

Supplementary Fig. 15 | Gating strategy for PBMC T cell staining.

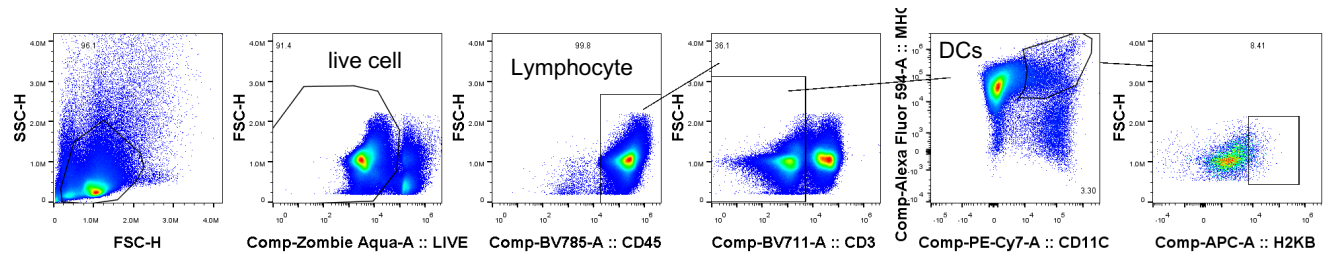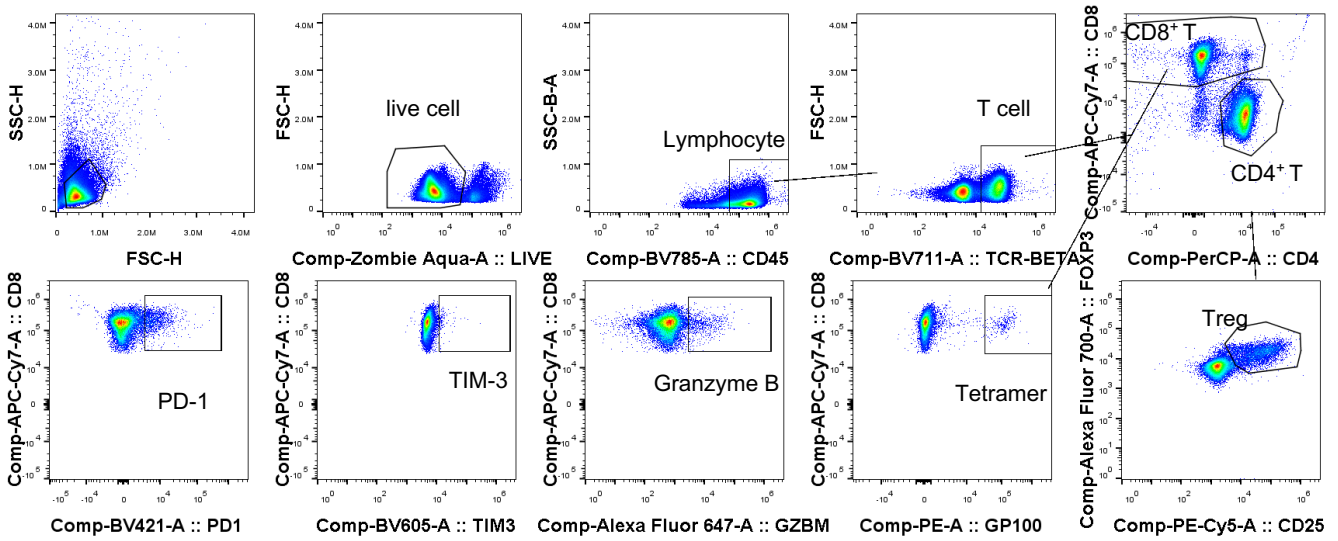

CD8<sup>+</sup> T

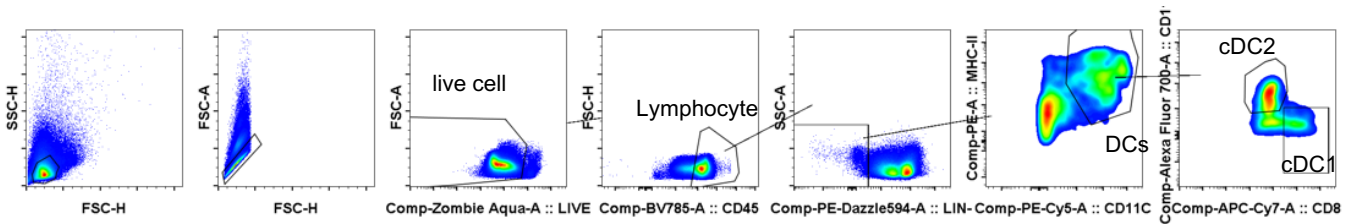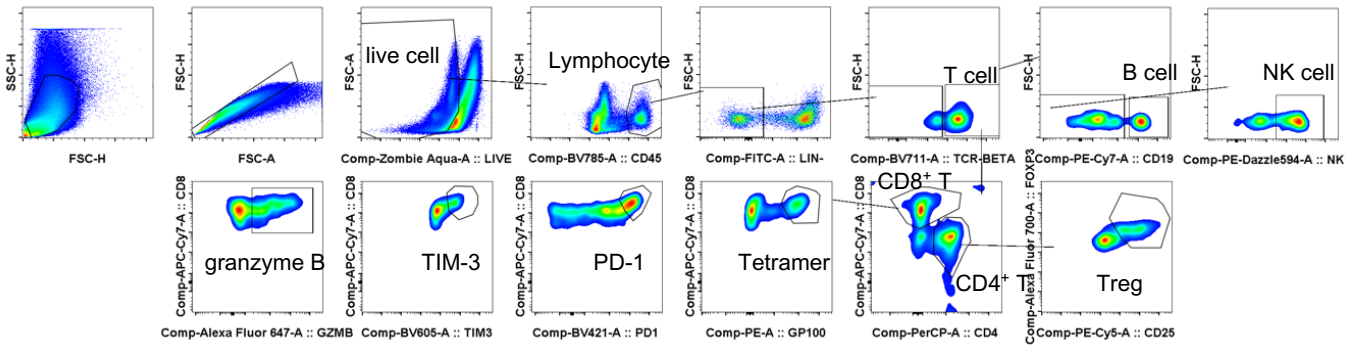

CD8<sup>+</sup> T

Supplementary Fig. 16 | Gating strategy for staining DCs and T cells from lymph nodes.

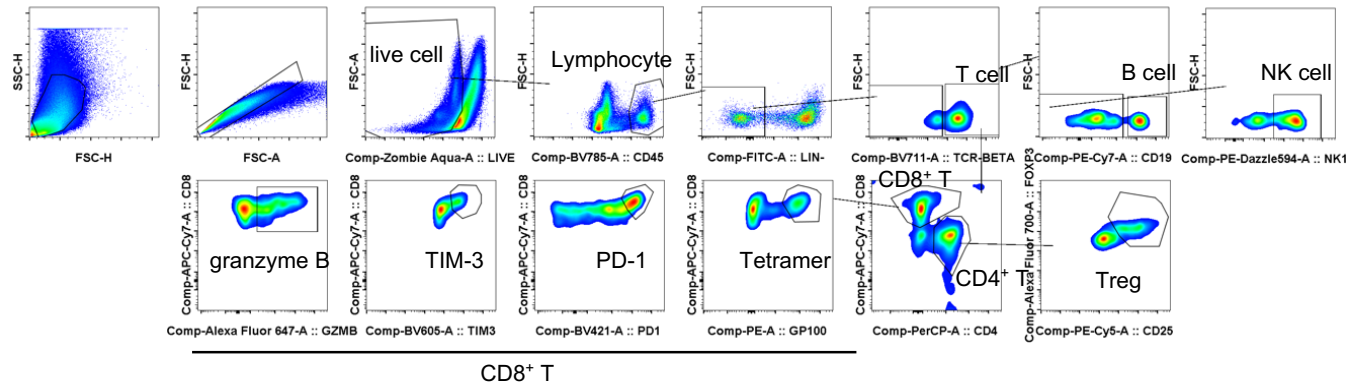

Supplementary Fig. 17 | Gating strategy for TME T cell staining.

## Supplementary Tables

**Supplementary Table 1 | Oligonucleotide sequences.**

| Name | Sequence (5' → 3')                                             |
|------|----------------------------------------------------------------|
| CpG  | TCCATGACGTTCTGACGTT                                            |
| Svg3 | CAGGGGGGACCACTCTTAAGCCTCAAGGGAAGCTGGGTTGAGGCTTAAGAGTGGTCCCGGGT |

**Supplementary Table 2 | A list of peptides used in this study.**

| Peptides                | Sequences |
|-------------------------|-----------|
| SIINFEKL                | SIINFEKL  |
| Trp <sub>2180-188</sub> | SVYDFFVWL |
| gp100 <sub>25-33</sub>  | KVPRNQDWL |
| Trp <sub>1456-462</sub> | TAPDNLGY  |

**Supplementary Table 3 | A list of antibodies used in this study.**

| Targets        | Fluorochromes        | Clones        | Vendors       | Catalogue # |
|----------------|----------------------|---------------|---------------|-------------|
| CD45           | Brilliant Violet 421 | 30-F11        | BioLegend     | 103133      |
| CD11c          | Alexa Fluor 594      | N418          | BioLegend     | 117346      |
| CD11b          | FITC                 | M1/70         | BioLegend     | 101205      |
| CD8α           | APC-Cy7              | 53-6.7        | BioLegend     | 100713      |
| CD4            | PerCP-Cy5.5          | GK1.5         | BioLegend     | 100433      |
| CD103          | Brilliant Violet 605 | 2E7           | BioLegend     | 121433      |
| CD205          | PE-Cy7               | NLDC-145      | BioLegend     | 138209      |
| F4/80          | APC-Cy7              | BM8           | BioLegend     | 123117      |
| CD11b          | PE-Cy5               | M1/70         | BioLegend     | 101209      |
| NK1.1          | APC                  | S17016D       | BioLegend     | 156505      |
| CD3            | PerCP-Cy5.5          | 17A2          | BioLegend     | 100217      |
| CD279 (PD-1)   | Brilliant Violet 421 | 29F.1A12      | BioLegend     | 135217      |
| IFN-γ          | PE                   | XMG1.2        | BioLegend     | 505807      |
| TNF-α          | FITC                 | MP6-XT22      | BioLegend     | 506303      |
| CD44           | Alexa Fluor 647      | IM7           | BioLegend     | 103018      |
| CD62L          | FITC                 | MEL-14        | BioLegend     | 104405      |
| CD25           | FITC                 | 3C7           | BioLegend     | 101907      |
| FoxP3          | Alexa Fluor 647      | MF-14         | BioLegend     | 126407      |
| IL-10          | Brilliant Violet 711 | JES5-16E3     | BioLegend     | 505041      |
| MerTK          | APC                  | 2B10C42       | BioLegend     | 151508      |
| XCR1           | APC-Cy7              | ZET           | BioLegend     | 148224      |
| CD19           | PE-Dazzle 594        | 6D5           | BioLegend     | 115554      |
| Granzyme B     | APC                  | QA16A02       | BioLegend     | 372203      |
| Ubiquitin      | N/A                  | P4D1          | BioLegend     | 646302      |
| CD279 (PD-1)   | N/A                  | RMP1-14-CP162 | Bio X Cell    | CP162       |
| CD152 (CTLA-4) | N/A                  | 9H10-CP146    | Bio X Cell    | CP146       |
| β-actin        | N/A                  | 15G5A11/E2    | Thermo Fisher | MA1-140     |
| OVA            | N/A                  | N/A           | Thermo Fisher | PA1-196     |
| GAPDH          | N/A                  | 5-E10         | Thermo Fisher | MA5-45076   |
